# Supplementary material
Source: Springer Nature journal article supplement (https://www.springermedizin.de/resource/supplementary/12985_2012_2009_MOESM1_ESM.pdf/9610754)

# RdRp

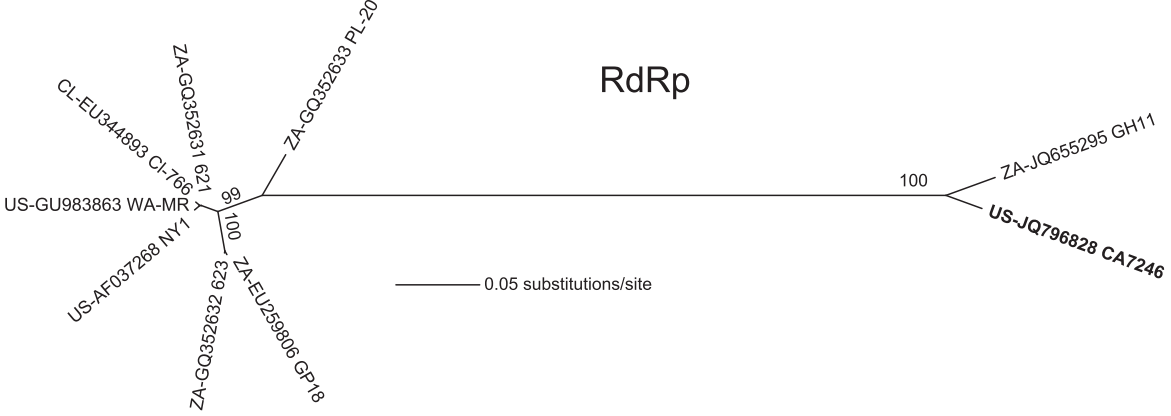

# HSP70h

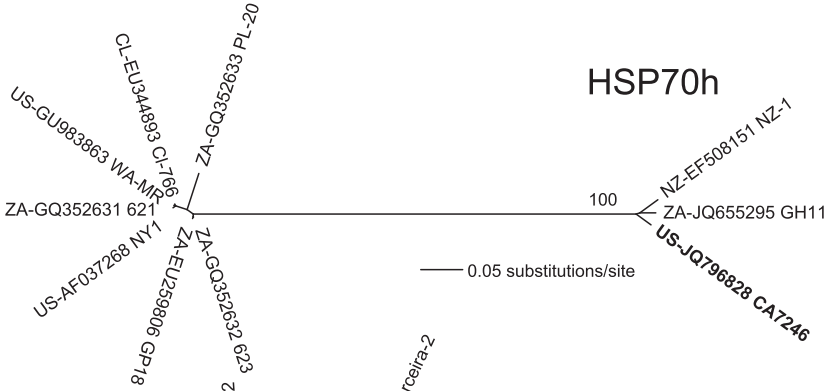

# CP

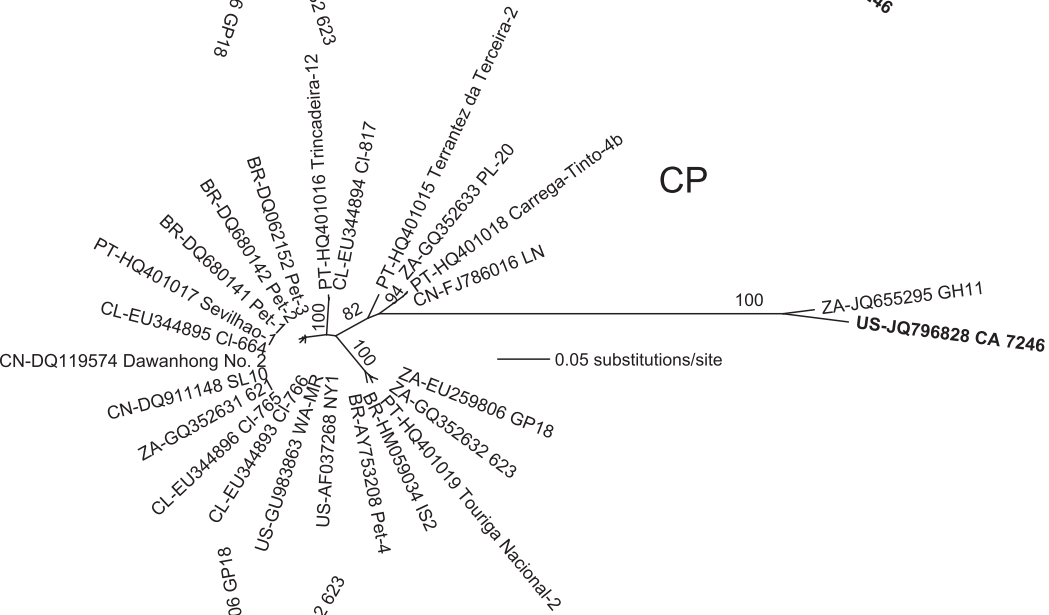

# CPm

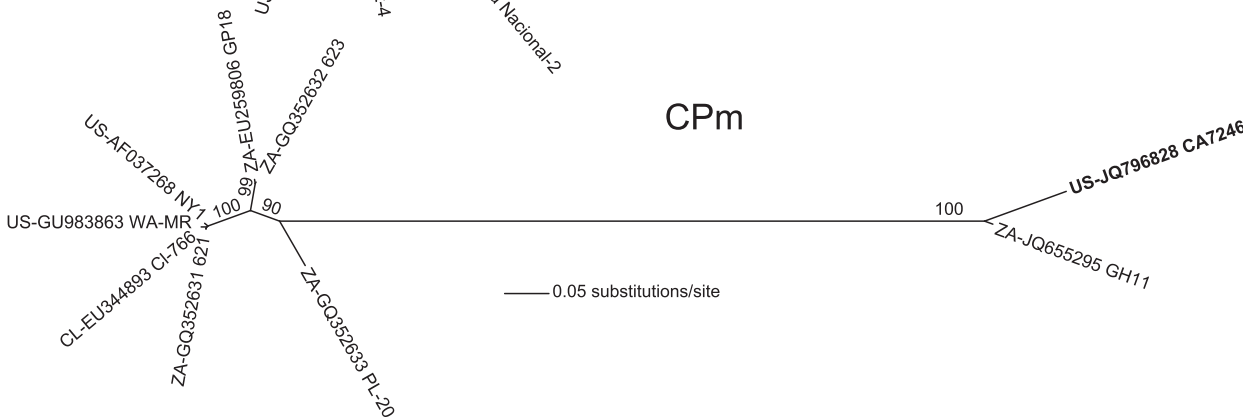

Supplement: MOESM1 [file 9610754]
